# Supplementary material for: Ruthenium(0) nanoparticles supported on xonotlite nanowire: a long-lived catalyst for hydrolytic dehydrogenation of ammonia-borane
Source: Royal Society of Chemistry journal article supplement (doi:10.1039/c3dt52701h), 2013-10-16
Supplement: c3dt52701h.pdf [file c3dt52701h.pdf]

**Supplementary Material (ESI) for Dalton Trans.**

**Ruthenium(0) nanoparticles supported on xonotlite nanowire a long-lived catalyst for hydrolytic dehydrogenation of ammonia-borane**

*Serdar Akbayrak, Saim Özkar\**

Department of Chemistry, Middle East Technical University, 06800, Ankara, Turkey

\*Corresponding author. Tel.: +90 312 210 3212; Fax: +90 312 210 3200

E-mail address: [sozkar@metu.edu.tr](mailto:sozkar@metu.edu.tr)

**Supplementary (SI):**

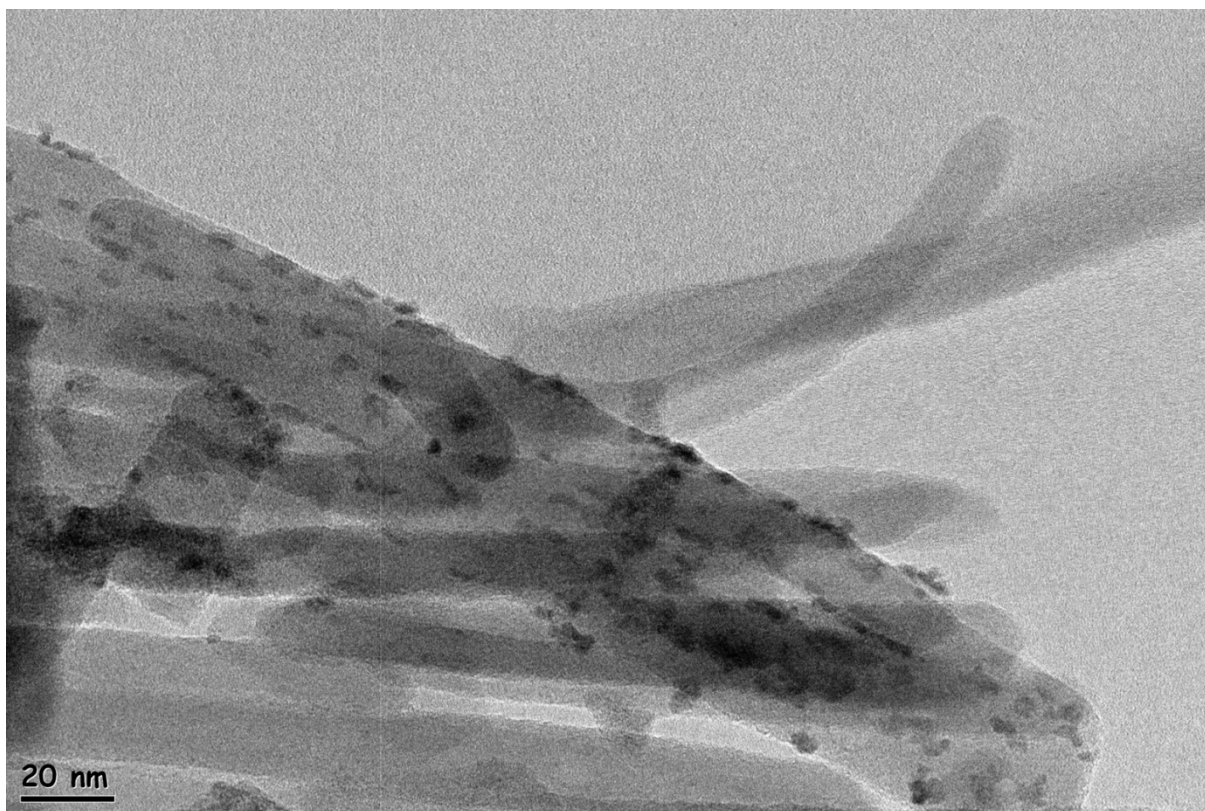

**Fig.S1.** TEM image of *in situ* generated ruthenium(0) nanoparticles supported on xonotlite nanowire during the hydrolysis of AB at room temperature

**Scheme S1** Illustration of the hydrolytic dehydrogenation of ammonia borane as reporter reaction: P is the precursor ruthenium(III) ion-supported on xonotlite nanowire and Q is the growing Ru(0)<sub>n</sub> nanoparticles catalyst.

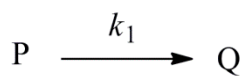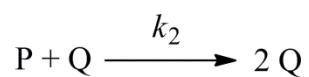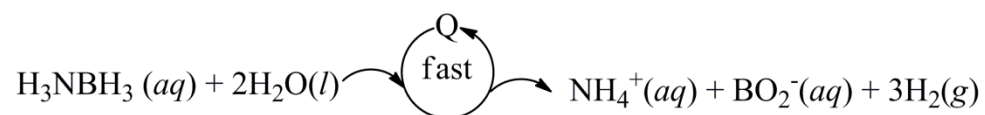

### Equation S1

$$y=A-\frac{(K_1/K_2)+A}{1+(K_1/(K_2 * A)) * \exp((K_1+K_2 * A) * x)}$$

$$[A]_t = \frac{\frac{k_1}{k_2} + [A]_0}{1 + \frac{k_1}{k_2[A]_0} * \exp(k_1 + k_2[A]_0) t}$$
